# Supplementary material for: Comparison between Membrane and Thermal Dealcoholization Methods: Their Impact on the Chemical Parameters, Volatile Composition, and Sensory Characteristics of Wines
Source: MDPI journal article supplement (doi:10.3390/membranes11120957), 2021-12-01
Supplement: s1 [file s1]

**Table S1.** Odor activity values (OAV > 0.1) and odor description of the would-be impact odorants of the original wines and the dealcoholized (0.7% v/v) fractions.

| Compounds                               | Odor description <sup>a</sup> | Odor<br>threshold<br>(µg/L) <sup>b</sup> | Odor activity value  |                       |                     |                      |                      |                    |                      |                      |                     | Aroma classes <sup>c</sup> |
|-----------------------------------------|-------------------------------|------------------------------------------|----------------------|-----------------------|---------------------|----------------------|----------------------|--------------------|----------------------|----------------------|---------------------|----------------------------|
|                                         |                               |                                          | White wine           |                       |                     | Rose wine            |                      |                    | Red wine             |                      |                     |                            |
|                                         |                               |                                          | CK                   | RO                    | VD                  | CK                   | RO                   | VD                 | CK                   | RO                   | VD                  |                            |
| <i>Esters</i>                           |                               |                                          |                      |                       |                     |                      |                      |                    |                      |                      |                     |                            |
| Isoamyl acetate                         | Banana                        | 30                                       | 71.840 <sup>a</sup>  | 24.330 <sup>b</sup>   | 17.197 <sup>b</sup> | 180.722 <sup>a</sup> | 59.243 <sup>b</sup>  | ND                 | 37.415 <sup>a</sup>  | 15.107 <sup>b</sup>  | 5.773 <sup>c</sup>  | 2                          |
| Ethyl hexanoate                         | Fruity, green apple           | 14                                       | 153.737 <sup>a</sup> | 13.152 <sup>b</sup>   | 0.164 <sup>b</sup>  | 122.313 <sup>a</sup> | 9.075 <sup>b</sup>   | 0.133 <sup>c</sup> | 69.034 <sup>a</sup>  | 11.400 <sup>b</sup>  | 0.031 <sup>c</sup>  | 2                          |
| Hexyl acetate                           | Fruity, herb                  | 670                                      | 0.044 <sup>a</sup>   | 0.029 <sup>b</sup>    | 0.014 <sup>c</sup>  | 1.727 <sup>a</sup>   | 0.292 <sup>b</sup>   | 0.128 <sup>b</sup> | 0.107                | ND                   | ND                  | 2,6                        |
| Ethyl octanoate                         | Floral, fruity, pear          | 240                                      | 37.464 <sup>a</sup>  | 0.384 <sup>b</sup>    | 0.074 <sup>b</sup>  | 16.068 <sup>a</sup>  | 0.858 <sup>b</sup>   | 0.069 <sup>c</sup> | 10.438 <sup>a</sup>  | 0.242 <sup>b</sup>   | 0.026 <sup>c</sup>  | 1,2                        |
| Ethyl decanoate                         | Fruity, grape                 | 200                                      | 9.096 <sup>a</sup>   | 0.083 <sup>b</sup>    | 0.024 <sup>b</sup>  | 5.884 <sup>a</sup>   | 0.485 <sup>b</sup>   | 0.011 <sup>c</sup> | 3.678 <sup>a</sup>   | 0.018 <sup>b</sup>   | 0.004 <sup>b</sup>  | 2                          |
| Phenethyl acetate                       | Floral, rose                  | 250                                      | 0.939 <sup>a</sup>   | 0.247 <sup>b</sup>    | 0.003 <sup>b</sup>  | 2.771 <sup>a</sup>   | 1.190 <sup>b</sup>   | 0.648 <sup>c</sup> | 0.347 <sup>a</sup>   | 0.126 <sup>b</sup>   | ND                  | 1                          |
| <i>Alcohols</i>                         |                               |                                          |                      |                       |                     |                      |                      |                    |                      |                      |                     |                            |
| 1-Hexanol                               | Cut grass, floral             | 110                                      | 1.123 <sup>a</sup>   | 0.421 <sup>b</sup>    | 0.007 <sup>b</sup>  | 1.183 <sup>a</sup>   | 0.490 <sup>b</sup>   | 0.004 <sup>c</sup> | 3.148 <sup>a</sup>   | 1.219 <sup>b</sup>   | ND                  | 1,6                        |
| 1-Octanol                               | Jasmine, lemon                | 40                                       | 0.326 <sup>a</sup>   | 0.164 <sup>ab</sup>   | 0.012 <sup>b</sup>  | 0.177 <sup>a</sup>   | 0.110 <sup>b</sup>   | 0.006 <sup>c</sup> | 0.788 <sup>a</sup>   | 0.320 <sup>b</sup>   | 0.007 <sup>c</sup>  | 1,3                        |
| 2-Phenylethanol                         | Floral, rose, honey           | 10000                                    | 0.093 <sup>a</sup>   | 0.027 <sup>b</sup>    | 0.018 <sup>b</sup>  | 0.090 <sup>a</sup>   | 0.067 <sup>b</sup>   | 0.055 <sup>c</sup> | 0.278 <sup>a</sup>   | 0.069 <sup>b</sup>   | 0.056 <sup>c</sup>  | 1                          |
| Dodecanol                               | Fatty                         | 7                                        | 1.449 <sup>a</sup>   | 0.664 <sup>b</sup>    | 0.021 <sup>c</sup>  | 1.336 <sup>a</sup>   | 0.355 <sup>b</sup>   | 0.035 <sup>c</sup> | ND                   | ND                   | ND                  | 3                          |
| <i>Acids</i>                            |                               |                                          |                      |                       |                     |                      |                      |                    |                      |                      |                     |                            |
| Hexanoic acid                           | Cheese, fatty                 | 420                                      | 1.291 <sup>a</sup>   | 0.273 <sup>ab</sup>   | 0.244 <sup>b</sup>  | 0.985 <sup>a</sup>   | 0.255 <sup>b</sup>   | 0.216 <sup>c</sup> | 0.925 <sup>a</sup>   | 0.192 <sup>b</sup>   | 0.095 <sup>c</sup>  | 3                          |
| Octanoic acid                           | Rancid, fatty                 | 500                                      | 2.880 <sup>a</sup>   | 0.885 <sup>b</sup>    | 0.378 <sup>b</sup>  | 6.187 <sup>a</sup>   | 0.228 <sup>c</sup>   | 0.578 <sup>b</sup> | 1.454 <sup>a</sup>   | 0.431 <sup>b</sup>   | 0.067 <sup>c</sup>  | 3                          |
| Decanoic acid                           | Rancid fat                    | 1400                                     | 0.104 <sup>a</sup>   | 0.023 <sup>b</sup>    | 0.012 <sup>b</sup>  | 0.080 <sup>a</sup>   | 0.072 <sup>b</sup>   | 0.012 <sup>c</sup> | 0.125 <sup>a</sup>   | 0.020 <sup>b</sup>   | 0.011 <sup>c</sup>  | 3                          |
| <i>Terpenics and C13-Norisoprenoids</i> |                               |                                          |                      |                       |                     |                      |                      |                    |                      |                      |                     |                            |
| Linalool                                | Floral                        | 25                                       | 0.335 <sup>b</sup>   | 0.543 <sup>a</sup>    | 0.030 <sup>c</sup>  | 0.344 <sup>a</sup>   | 0.299 <sup>a</sup>   | 0.053 <sup>b</sup> | ND                   | ND                   | ND                  | 1                          |
| β-damascenone                           | Rose, floral, fruity          | 0.05                                     | 737.636 <sup>a</sup> | 411.738 <sup>ab</sup> | 38.559 <sup>b</sup> | 271.403 <sup>a</sup> | 174.947 <sup>b</sup> | 7.090 <sup>c</sup> | 293.970 <sup>a</sup> | 111.771 <sup>b</sup> | 18.690 <sup>c</sup> | 1,2                        |
| Geraniol                                | Rose, geranium                | 20                                       | 1.241 <sup>a</sup>   | 0.241 <sup>b</sup>    | 0.016 <sup>c</sup>  | 0.595 <sup>a</sup>   | 0.228 <sup>b</sup>   | 0.004 <sup>c</sup> | ND                   | ND                   | ND                  | 1                          |
| Geranyl acetone                         | Floral                        | 60                                       | 0.174 <sup>a</sup>   | 0.113 <sup>a</sup>    | 0.011 <sup>b</sup>  | 0.075 <sup>a</sup>   | 0.037 <sup>b</sup>   | 0.006 <sup>c</sup> | 0.077                | ND                   | ND                  | 1                          |
| <i>Others</i>                           |                               |                                          |                      |                       |                     |                      |                      |                    |                      |                      |                     |                            |
| Benzaldehyde                            | Sweet, fruity                 | 350                                      | 0.172 <sup>a</sup>   | 0.036 <sup>b</sup>    | 0.018 <sup>b</sup>  | 0.313 <sup>a</sup>   | 0.043 <sup>b</sup>   | 0.002 <sup>b</sup> | 0.033 <sup>a</sup>   | 0.011 <sup>b</sup>   | 0.003 <sup>c</sup>  | 2                          |

<sup>a</sup> Odor descriptions are mainly obtained from the following literatures: flavornet database (<http://www.flavornet.org>, accessed August 2021), [60,81,90–93,82–89]

<sup>b</sup> Thresholds are mainly gotten from the following literatures: [9,60,92,93,107–109,81,83,85–88,90,91]

<sup>c</sup> Each compound was attributed to 1 or more aroma class of sensory descriptors as follows: 1, floral; 2, fruity; 3, fatty; 4, pungent; 5, spicy; 6, vegetative; 7, earthy.
